# Supplementary material for: Bisphenol A Impairs Lipid Remodeling Accompanying Cell Differentiation in the Oligodendroglial Cell Line Oli-Neu
Source: MDPI journal article supplement (doi:10.3390/molecules27072274), 2022-03-31
Supplement: s1 [file s1]

## Bisphenol A impairs lipid remodeling accompanying cell differentiation in the oligodendroglial cell line oli-neu

Naffaa Vanessa<sup>1</sup>, Hochar Isabelle<sup>1</sup>, Lama Chéryane<sup>1</sup>, Magny Romain<sup>1,2</sup>, Regazzetti Anne<sup>1</sup>, Gressens Pierre<sup>3</sup>, Lapr v te Olivier<sup>1,4</sup>, Auzeil Nicolas<sup>1,#</sup>, Schang Anne-Laure<sup>5,#,\*</sup>

#: contributed equally to this work

\*Corresponding author: anne-laure.schang@parisdescartes.fr

<sup>1</sup> Universit  de Paris, CNRS, CiTCoM, F-75006 Paris, France

<sup>2</sup> Sorbonne Universit , UM80, INSERM UMR 968, CNRS UMR 7210, Institut de la Vision, IHU ForeSight, Paris, France

<sup>3</sup> Universit  de Paris, NeuroDiderot, Inserm, F-75019 Paris, France

<sup>4</sup> H pital Europ en Georges Pompidou, AP-HP, Service de Biochimie, Paris, France

<sup>5</sup> Universit  de Paris, UMR 1153 CRESS, Paris, France

### Supplementary materials

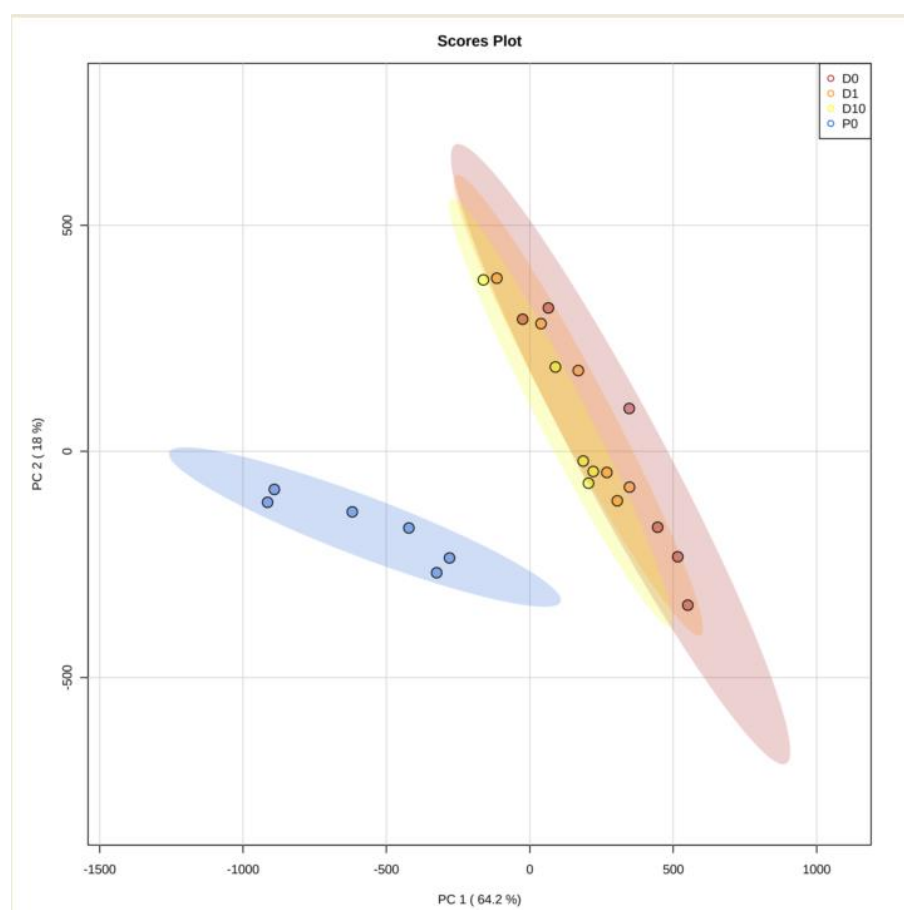

Supplementary Figure S1: Principal component analysis (PCA) models comparing lipid distribution (mol %) of proliferation P0 and differentiated groups D0, D1 and D10.

Supplementary Table S1: qPCR primer sequences

| Gene name        | Forward (5'→3')       | Reverse (5'→3')       |
|------------------|-----------------------|-----------------------|
| <i>Arsa</i>      | GGTGTTGACATCAGCCCCTT  | TGGATCTCGTCTGGGTAGGG  |
| <i>CNPase</i>    | AGAGACCTCCAGGTGTGCTG  | GGCTCATTGGGAATAGGGGAG |
| <i>Eovl 1</i>    | CAGCCCTACCTTTGGTGGAA  | GTGAAGGTAGCCAGCTGATGT |
| <i>Eovl 2</i>    | ACTACGGCCTGTCTGTGTTC  | TTGGCTGGAGCCAGGAAATC  |
| <i>Eovl 4</i>    | ATCTCCTGTTTCGTGTGGCTG | CCGGAACCTTCCCAAGTCA   |
| <i>Eovl 5</i>    | TCGATGCGTCACTCAGTACC  | GATACAGGTACAGCGTGCCA  |
| <i>Eovl 6</i>    | CCGAAGATCAGCCCCAATGA  | CACCAAGCCCGAGACAAGAA  |
| <i>Eovl 7</i>    | TGGGACCAGCCTACCAGAAG  | ACCGGCCAGAGTGTTCAT    |
| <i>Gal 3st 1</i> | TCCAAGGCCAAGGGGTACT   | AAGTCTCCAAGCGCTTCAT   |
| <i>Gal c</i>     | GGCTTGGGAAACCTCACCAT  | AAGGGGACAGATGGTCCAG   |
| <i>Gba</i>       | GCTAGATGACCAACGCTTGC  | CATCAAAGGGCCTGTCCAGT  |
| <i>Gba2</i>      | ACCTCATGGTGTCCCTGAT   | GGTCCCATAATGCCGACAGG  |
| <i>Mig</i>       | GTCTCTACCCGGGATTGTCA  | TCTGAGCCCTCTGCCGATAA  |
| <i>MBP</i>       | CCGGACCCAAGATGAAAAC   | CCCAGGTCTGAGTGGGAATA  |
| <i>Mog</i>       | AAGAGGCAGCAATGGAGTTG  | GACCTGCAGGAGGATCGTAG  |
| <i>Ppl</i>       | CCAAATGACCTTCCACCTGT  | CGAAGTTGTAAGTGGCAGCA  |
| <i>Sgms 1</i>    | TTTTAACCGGGTGCAGTGGG  | TGGGTGTCACAAAGAGAGCA  |
| <i>Sgms 2</i>    | TCTCGTAGCGCATGAACACT  | CTTGGGATGGAGGTGGTGT   |
| <i>Snpd1</i>     | AATTGGCCACATCCCTCCAG  | TTGCAGCTGGGCATGAAGTA  |
| <i>Snpd2</i>     | TCCAGCCATGAAGCTCAACT  | TGAGACAGCCAAAGGGGAAG  |
| <i>Sptlc1</i>    | ACCTGGAGCGACTGCTAAAAG | TCCTGCGTTGTATGATCCCA  |
| <i>Sptlc2</i>    | TGCCTGTCAGCAGCTCATAC  | TGGTCCCAGCCATACAATGAG |
| <i>Ugcg</i>      | CATTCAACTCAGGGGTGTCCA | CGTACAGCGCAGAAAACAGG  |
| <i>Ugt 8a</i>    | CAGGCAAAAGGCATGGGGAT  | TGCAGTCCTCCATGAAGAAGA |
